# Supplementary material
Source: Elsevier journal article supplement (https://www.sciencedirect.com/science/article/pii/S2173572717301856)
Supplement: mmc1 [file S2173572717301856:mmc1.doc]

**APPENDIX A** [{(Anexo)}] Additional material

You can see additional material on this paper in its electronic version through <doi:10.1016/j.medin.2017.01.007>.
