# Supplementary material
Source: Elsevier journal article supplement (https://www.sciencedirect.com/science/article/pii/S2173572717301856)
Supplement: mmc2 [file S2173572717301856:mmc2.doc]

**APPENDIX B** [{(Anexo A)}] Additional mate

mmc1

mmc2
